# Supplementary material for: Rapid and high-yielding cysteine labelling of peptides with N-succinimidyl 4-[18F]fluorobenzoate
Source: Royal Society of Chemistry journal article supplement (doi:10.1039/c2cc32095a), 2012-01-01
Supplement: c2cc32095a.pdf [file c2cc32095a.pdf]

## Supporting Information

### **Rapid and High-Yielding Cysteine Labelling of Peptides with *N*-Succinimidyl 4-[<sup>18</sup>F]Fluorobenzoate**

*Sergio Abad,\*<sup>a</sup> Pau Nolis,<sup>b</sup> Juan D. Gispert,<sup>c</sup> Jan Spengler,<sup>d</sup> Fernando Albericio,<sup>d</sup> Santiago Rojas<sup>ac</sup> and José R. Herance\*<sup>ac</sup>*

Centre d'Imatge Molecular, CRC Corporació Sanitària, 08003 Barcelona, Spain;<sup>a</sup> Servei de Ressonància Magnètica Nuclear, Universitat Autònoma de Barcelona, 08193 Bellaterra, Spain;<sup>b</sup> Fundació Privada Institut d'Alta Tecnologia-Parc de Recerca Biomèdica de Barcelona, 08003 Barcelona, Spain;<sup>c</sup> Institute for Research in Biomedicine, Barcelona. Networking Centre on Bioengineering, Biomaterials and Nanomedicine, Barcelona Science Park, 08028 Barcelona, Spain;<sup>d</sup>

\* To whom correspondence should be addressed. Sergio Abad: Tel: +34 93 551 16 05, [sabad@crccorp.es](mailto:sabad@crccorp.es); José R. Herance: Tel: +34 93 551 16 00, Fax: +34 93 551 16 01, [rherance@crccorp.es](mailto:rherance@crccorp.es)

#### **Table of Contents**

|                                                                                            |     |
|--------------------------------------------------------------------------------------------|-----|
| 1. Experimental Procedures                                                                 | S2  |
| 2. <sup>1</sup> H and 2D TOCSY NMR spectra of <b>2</b>                                     | S10 |
| 3. <sup>1</sup> H and <sup>13</sup> C NMR spectra of <b>3</b>                              | S11 |
| 4. <sup>1</sup> H, <sup>13</sup> C, 2D COSY, 2D HSQC, and 2D HMBC NMR spectra of <b>1a</b> | S12 |
| 5. <sup>1</sup> H, <sup>13</sup> C, 2D COSY, 2D HSQC, and 2D HMBC NMR spectra of <b>2a</b> | S15 |
|                                                                                            | S1  |

|                                                                                            |     |
|--------------------------------------------------------------------------------------------|-----|
| 9. $^1\text{H}$ , $^{13}\text{C}$ , 2D COSY, 2D HSQC, and 2D HMBC NMR spectra of <b>3a</b> | S17 |
| 6. NMR characterisation of <b>4a</b>                                                       | S21 |

## **Experimental Procedures**

### ***General methods***

All chemicals, solvents, and materials were commercially available and used as received without further purification. Silica gel (230-400 mesh) from Scharlau was used for column chromatography. Analytical and semi-preparative HPLC runs were performed using an Agilent 1100 Series coupled to a MS (API-ES positive ionization mode), UV-Vis diode array, and a Raytest Gina isotopic detectors. As stationary phase, analytical and semi-preparative Teknokroma Mediterranea Sea<sub>18</sub> columns (5  $\mu\text{m}$ ) were employed. The cyclotron used for  $^{18}\text{F}$  production was an 18/9 model from IBA.  $^1\text{H}$ ,  $^{13}\text{C}$  and other routine NMR experiments (COSY, TOCSY, HSQC and HMBC) were usually obtained on a Bruker Avance III 600 MHz spectrometer equipped with a 5 mm TBI probe with Z-gradients. For some samples a Bruker Avance 500 MHz spectrometer equipped with a 5 mm triple channel ( $^1\text{H}$ ,  $^{13}\text{C}$ ,  $^{15}\text{N}$ ) cryoprobe with Z-gradients.  $^{19}\text{F}$  NMR experiments were performed with a Bruker Avance III 400 spectrometer equipped with a 5 mm BBOF probe with Z-gradients.

### ***Preparation of Fmoc-Cys-OH (1)***

Compound **1** was synthesised according to a procedure previously described by Zhao et al.; H.-Y Zhao, G. Liu, *J. Comb. Chem.*, 2008, **9**, 756.

### ***Preparation of Fmoc-Cys-Arg(Pmc)-OH (2)***

Fmoc-Arg(Pmc)-OH (0.75 mmol) was dissolved in acetonitrile/piperidine (4/1 v/v, 5 mL) at room temperature. After one hour, the crude mixture was dried and purified by silica gel flash chromatography using ethyl acetate/methanol/triethylamine (7.9/2/0.1 v/v/v) as eluent. Then, the compound was solved (0.46 mmol) in dichloromethane (3

mL) and drop-wise added during 30 minutes over a solution of Fmoc-Cys(Trt)-OH (0.5 mmol), 1-hydroxybenzotriazole (0.5 mmol), and 1,3-diisopropylcarbodiimide (0.5 mmol) in dichloromethane (7 mL). The mixture was allowed to react for 2 hours at room temperature. After washing the reaction crude with water, the dipeptide was purified by silica gel chromatography using a solvent gradient from chloroform to chloroform/methanol (9/1 v/v). Finally, the dipeptide was reacted with TFA (1.0 mmol) and triethylsilane (1.0 mmol) in dichloromethane (0.6 mL) at room temperature for 2 hours. Then, the crude was dried under vacuum and purified by flash chromatography using a solvent gradient from chloroform to chloroform/methanol (9/1 v/v). **2** was obtained as a white solid.  $^1\text{H}$  NMR (500 MHz, DMSO)  $\delta$  7.76 (d,  $J$  = 7.8 Hz, 2H), 7.60 (d,  $J$  = 7.0 Hz, 1H), 7.59 (d,  $J$  = 7.3, 1H), 7.55 (b, 0.8H), 7.41 (t,  $J$  = 7.2 Hz, 1H), 7.40 (t,  $J$  = 7.3 Hz, 1H), 7.31 (d,  $J$  = 7.2, 1H), 7.30 (d,  $J$  = 7.2, 1H), 4.67 (b, 0.8H), 4.62 (b, 1H), 4.51 (b, 1H), 4.44 (b, 1H), 4.37 (b, 1H), 4.20 (t,  $J$  = 7.0, 1H), 3.21 (b, 2H), 2.99 (m, 1H), 2.88 (m, 1H), 2.61 (t,  $J$  = 6.4, 2H), 2.54 (s, 3H), 2.52 (s, 3H), 2.10 (s, 3H), 1.31 (s, 3H), 1.28 (s, 3H). MS-ESI (positive mode) for **2**:  $[\text{M}+\text{H}]^+$ ,  $m/z$  = 766.

### ***Preparation of Fmoc-Cys-Arg-OH (3)***

**2** (0.06 mmol) was reacted in TFA (0.5 mL) for one hour at room temperature. The reaction mixture was diluted with acetonitrile and purified by semi-preparative HPLC (25×1 cm, water/acetonitrile/TFA from 9/1/0.01 v/v/v to 6/4/0.01 v/v/v in 25 min, 5 mL·min<sup>-1</sup>). The collected fractions were dried under reduce pressure and compound **3** was obtained as a white solid.  $^1\text{H}$  NMR (500 MHz, DMSO):  $\delta$  8.31 (t,  $J$  = 9.3, 1H), 7.91 (d,  $J$  = 7.1, 1H), 7.89 (d,  $J$  = 7.8, 1H), 7.74 (m, 2H), 7.65 (m, 0.8H), 7.63 (d,  $J$  = 7.2, 0.8H), 7.43 (t,  $J$  = 7.4, 1H), 7.39 (t,  $J$  = 7.2, 1H), 7.34 (t,  $J$  = 7.6, 1H), 4.32 (m, 1H), 4.24 (m, 1H), 4.23 (m, 1H), 4.21 (m, 1H), 4.20 (m, 1H), 3.09 (m, 2H), 2.82 (m, 1H), 2.67 (m, 1H), 1.78 (m, 1H), 1.62 (m, 1H), 1.51 (m, 2H).  $^{13}\text{C}$  NMR (125 MHz, DMSO):

$\delta$  174.0, 171.2, 157.6, 156.8, 144.6, 141.6, 128.5, 128.0, 126.2, 121.0, 66.6, 58.0, 52.5, 47.5, 41.1, 28.8, 27.2, 26.0. MS-ESI (positive mode) for **2**:  $[M+H]^+$ ,  $m/z$  = 500.

***Preparation of peptide Ac-GCRGYGRGDSPG-NH<sub>2</sub> (4)***

The synthesis of peptide **4** was accomplished according to a published procedure; S, VandeVondele, J. Vörös, J. A. Hubbell, *Biotechnol. Bioeng.*, 2003, **82**, 784.

***Reaction of Cys thiols 1-4 with N-succinimidyl 4-fluorobenzoate (SFB)***

To a solution of the cysteine thiols (0.01 mmol) in a 2/1 (v/v) mixture (300  $\mu$ L) of DMSO/phosphate buffer (pH= 8.5, 0.2 M), SFB (0.015 mmol) solved in DMSO (200  $\mu$ L) was added. The progress of the reactions were monitored by HPLC/UV/MS (15 $\times$ 0.46 cm, water/acetonitrile/TFA from 8/2/0.01 v/v/v to 2/8/0.01 v/v/v in 30 min, 2 mL $\cdot$ min<sup>-1</sup>). The labelled compounds **1a**, **2a**, **3a**, and **4a** were purified by semi-preparative HPLC and the collected fractions were concentrated under vacuum to obtain white solids. Chemical yields were determined based on HPLC measurements by using isolate conjugates as standards.

***Purification of Fmoc-Cys(FB)-OH (1a) and Fmoc-Cys(FB)-Arg(Pmc)-OH (2a)***

Compound **1a** and **2a** were purified by semi-preparative HPLC (25 $\times$ 1 cm, water/acetonitrile/TFA from 5/5/0.01 v/v/v to 3/7/0.01 v/v/v in 10 min, 5 mL $\cdot$ min<sup>-1</sup>). <sup>1</sup>H NMR (500 MHz, CDCl<sub>3</sub>) for **1a**:  $\delta$  8.00 (d, 2H), 7.76 (d,  $J$  = 7.3 Hz, 2H), 7.57 (d,  $J$  = 7.6 Hz, 1H), 7.55 (d,  $J$  = 7.9 Hz, 1H), 7.40 (t,  $J$  = 6.7 Hz, 2H), 7.26 (t,  $J$  = 7.1 Hz, 2H), 7.14 (m, 2H), 5.82 (b, 1H), 4.69 (b, 1H), 4.41 (m, 1H), 4.36 (m, 1H), 4.23 (t,  $J$  = 6.2 Hz, 1H), 3.70 (m, 1H), 3.57 (m, 1H). <sup>13</sup>C NMR (125 MHz, CDCl<sub>3</sub>) for **1a**:  $\delta$  167.7, 166.3, 144.0, 141.7, 132.9, 130.7, 130.6, 128.1, 127.5, 125.5, 120.4, 116.4, 116.2, 68.0, 54.6, 47.4, 31.0. MS-ESI (positive mode) for **1a**:  $[M+Na]^+$ ,  $m/z$  = 488.

<sup>1</sup>H NMR (500 MHz, DMSO) for **2a**:  $\delta$  8.34 (d,  $J$  = 7.2, 0.9H), 7.99 (d,  $J$  = 8.5, 1H), 7.98 (d,  $J$  = 8.5, 1H), 7.89 (d,  $J$  = 7.2, 2H), 7.79 (d,  $J$  = 8.5, 0.8H), 7.71 (d,  $J$  = 7.0, 1H),

7.70 (d,  $J = 7.1$ , 1H), 7.41 (t,  $J = 7.2$ , 2H), 7.39 (t,  $J = 8.5$ , 2H), 7.29 (t,  $J = 7.2$ , 2H), 6.7 (b, 0.9H), 6.39 (b, 0.9H), 4.32 (m, 1H), 4.30 (m, 1H), 4.24 (m, 1H), 4.21 (m, 1H), 4.17 (m, 1H), 3.51 (dd,  $J = 13.3$ ,  $J = 4.1$ , 1H), 3.23 (dd,  $J = 13.3$ ,  $J = 9.5$ , 1H), 3.04 (m, 2H), 2.56 (t,  $J = 6.5$ , 2H), 2.48 (s, 3H), 2.47 (s, 3H), 2.02 (s, 3H), 1.76 (t,  $J = 6.5$ , 2H), 1.74 (m, 1H), 1.59 (m, 1H), 1.46 (m, 2H), 1.25 (s, 6H).  $^{13}\text{C}$  NMR (125 MHz, DMSO) for **2a**:  $\delta$  190.2, 174.0, 170.7, 166.2, 156.8, 156.7, 153.2, 144.6, 141.5, 135.4, 135.0, 133.7, 130.7, 128.5, 127.9, 126.1, 123.5, 121.0, 118.6, 117.0, 74.3, 66.7, 54.5, 52.7, 47.4, 40.3, 33.0, 31.9, 29.1, 27.3, 26.4, 21.6, 19.0, 18.0, 12.8. MS-ESI (positive mode) for **2a**:  $[\text{M}+\text{H}]^+$ ,  $m/z = 888$ .

#### ***Purification of Fmoc-Cys(FB)-Arg-OH (3a)***

Conjugate **3a** was isolated by injection of the reaction mixture into a semipreparative HPLC system (25×1 cm, water/acetonitrile/TFA from 6/4/0.01 v/v/v to 4.5/5.5/0.01 v/v/v in 15 min, 5 mL·min<sup>-1</sup>).  $^1\text{H}$  NMR (500 MHz, DMSO):  $\delta$  8.28 (b, 0.6H), 7.99 (m, 2H), 7.90 (d,  $J = 7.3$ , 2H), 7.83 (d,  $J = 8.7$ , 1H), 7.71 (d,  $J = 7.3$ , 2H), 7.58 (b, 0.7H), 7.42 (t,  $J = 7.4$ , 2H), 7.39 (t,  $J = 7.3$ , 2H), 7.30 (m, 2H), 4.33 (m, 1H), 4.32 (m, 1H), 4.23 (m, 1H), 4.22 (m, 1H), 4.20 (m, 1H), 3.53 (dd,  $J = 13.4$ ,  $J = 4.2$ , 1H), 3.10 (q,  $J = 6.1$ , 2H), 1.77 (m, 1H), 1.63 (m, 1H), 1.52 (q,  $J = 7.1$ , 2H).  $^{13}\text{C}$  NMR (125 MHz, DMSO):  $\delta$  190.2, 157.5, 156.7, 144.6, 144.5, 145.6, 133.7, 130.6, 130.7, 128.5, 127.9, 126.2, 121.0, 117.2, 117.0, 66.7, 54.6, 52.9, 47.4, 41.2, 32.0, 29.1, 26.0. MS-ESI (positive mode) for **3a**:  $[\text{M}+\text{H}]^+$ ,  $m/z = 622$ .

#### ***Purification of the peptide-FB conjugate (4a)***

The reaction crude was submitted to semi-preparative HPLC (25×1 cm, water/acetonitrile/TFA from 9/1/0.01 v/v/v to 6/4/0.01 v/v/v in 30 min, 5 mL·min<sup>-1</sup>). MS-ESI (positive mode) for **4a**:  $[\text{M}+2\text{H}]^{+2}$ ,  $m/z = 672.5$ . See below for NMR characterisation.

***Radiosynthesis of N-succinimidyl 4- $[^{18}\text{F}]$ fluorobenzoate ( $[^{18}\text{F}]$ SFB)***

$[^{18}\text{F}]$ SFB was synthesised according to the well established three-step one-pot procedure with some modifications by using assembled Eckert & Ziegler modules (Isotope Products, Inc.). Thus,  $^{18}\text{F}[\text{F}^-]$  was produced in a cyclotron by bombardment of  $[^{18}\text{O}]\text{H}_2\text{O}$  with high energy protons (18 MeV). Then, radioactivity was delivered to the automatic synthesiser system where  $^{18}\text{F}[\text{F}^-]$  aqueous solution was passed through a Sep-Pak light QMA cartridge (Waters, Inc.) to trap the fluoride. The  $^{18}\text{F}[\text{F}^-]$  was eluted from the trapping cartridge to the reaction vessel with a solution of potassium carbonate (5.5  $\mu\text{mol}$ ) and 4,7,13,16,21,24-hexaoxa-1,10-diazabicyclo[8.8.8]hexacosane ( $\text{K}_{222}$ , 18.7  $\mu\text{mol}$ ) in acetonitrile/water (1/1 v/v, 0.8 mL). The solvent was evaporated by applying He flow and vacuum at 110°C. To ensure that the drying process was done successfully, additional anhydrous acetonitrile (1 mL) was added and the mixture was dried as before. To the anhydrous  $\text{K}_{222}/[^{18}\text{F}]\text{KF}$  complex, a solution of ethyl 4-(trimethylammonium triflate) benzoate (20 mmol) in anhydrous acetonitrile (1 mL) was added and the mixture was heated at 90°C for 10 min. Then, tetrabutylammonium hydroxide (1 M in methanol, 25  $\mu\text{L}$ ) in anhydrous acetonitrile (0.4 mL) was added and the reaction vessel was heated at 120°C for 5 min. Subsequently, a solution of *N,N,N',N'*-tetramethyl-O-(*N*-succinimidyl)uranium tetrafluoroborate (0.05 mmol) in dry acetonitrile (0.6 mL) was added and the reaction was heated at 90°C for 2 min. The crude mixture was cooled down to 40°C and neutralized with aqueous acetic acid (5%, 3 mL). The final solution was purified by semipreparative HPLC (25 $\times$ 1 cm, water/acetonitrile/TFA 6/4/0.01, 7.5 mL $\cdot$ min $^{-1}$ ). The desired fraction ( $t_{\text{r}} \sim 9\text{-}11$  min) was collected over 0.9 % saline solution (20 ml) and passed through a Sep-Pak C18 cartridge (Waters, Inc.). The cartridge was rinsed with water (10 mL) and  $[^{18}\text{F}]$ SFB was eluted with acetonitrile (2 mL). The solvent was removed by bubbling  $\text{N}_2$  at room temperature to provide a dry residue.

Chemical and radiochemical purity was determined by analytical HPLC (15×0.46 cm, water/acetonitrile/TFA from 9/1/0.01 v/v/v to 6/4/0.01 v/v/v in 30 min, 2 mL·min<sup>-1</sup>). [<sup>18</sup>F]SFB was obtained in a radiochemical yield (RCY) of 37 ± 5 % (decay-corrected), with chemical and radiochemical purity exceeding 98 %. A specific activity of 102 ± 7 GBq/μmol was estimated. [<sup>18</sup>F]SFB was prepared in 74 ± 5 min.

#### ***Radiolabeling of cysteine thiols 1-4 with [<sup>18</sup>F]SFB***

To a solution of the thiol (0.15 μmol) in a 2/1 (v/v) mixture (30 μL) of DMSO/phosphate buffer (pH= 8.5, 0.2 M), [<sup>18</sup>F]SFB (*ca.* 20 MBq) in DMSO (20 μL) was added. The reaction was kept at room temperature and analysed at different reaction times. An analytical HPLC system (15×0.46 cm, water/acetonitrile/TFA from 8/2/0.01 v/v/v to 2/8/0.01 v/v/v in 30 min, 2 mL·min<sup>-1</sup>) were used to identify the thioesters (by co-elution with the corresponding <sup>19</sup>F-standards) and to determine the RCY obtained for the conjugates.

#### ***Radiosynthesis of [<sup>18</sup>F]Fmoc-Cys(FB)-OH (1b)***

The amino acid derivative **1** (1.5 μmol) was solved in a 2/1 (v/v) mixture (150 μL) of DMSO/phosphate buffer (pH 8.5, 0.2 M) and added to a solution of [<sup>18</sup>F]SFB (~2 GBq) in DMSO (100 μL). After reacting at room temperature for 30 min, the crude was diluted with aqueous TFA (0.1%, 2.6 mL) and injected into a semipreparative HPLC (25×1 cm, water/acetonitrile/TFA from 8/2/0.01 v/v/v to 2/8/0.01 v/v/v in 15 min, 5 mL·min<sup>-1</sup>). The fraction with product (*t<sub>r</sub>* ~ 16-18 min) was collected and passed through a Sep-Pak light C18 cartridge (Waters, Inc.) after dilution with saline (0.9 %, 20 ml). The cartridge was rinsed with water (10 mL) and compound **1b** was eluted with ethanol (1 mL) over phosphate buffer solution (PBS, pH = 7.4, 9 mL). Chemical and radiochemical purity were determined by analytical HPLC (25×0.46 cm, water/acetonitrile/TFA from 8/2/0.01 v/v/v to 2/8/0.01 v/v/v in 30 min, 2 mL·min<sup>-1</sup>) to

be > 95 % for > 4 hours with a specific activity of  $59 \pm 9$  GBq/ $\mu$ mol. **1b** was obtained in a RCY of  $9 \pm 3$  % (decay-corrected,  $56 \pm 6$  min).

***Radiosynthesis of [ $^{18}$ F]Fmoc-Cys(FB)-Arg(Pmc)-OH (2b)***

[ $^{18}$ F]SFB dry residue (~2 GBq) was solved in DMSO (100  $\mu$ L) and added to solution of **2** (0.75  $\mu$ mol) in a 2/1 (v/v) mixture (150  $\mu$ L) of DMSO/phosphate buffer (pH 8.5, 0.2 M). After reacting at room temperature for 10 min, the reaction mixture was diluted with aqueous TFA (0.1%, 2.6 mL) and purified by semipreparative HPLC (25 $\times$ 1 cm, water/acetonitrile/TFA 8/2/0.01 v/v/v to 2/8/0.01 v/v/v in 15 min, 5 mL $\cdot$ min $^{-1}$ ). The fraction of interest ( $t_r$  ~ 17-20 min) was collected and diluted with saline solution (0.9 %, 30 ml) and passed through a Sep-Pak light C18 cartridge (Waters, Inc.). The cartridge was rinsed with water (10 mL) and **2b** was eluted with ethanol (1 mL) over phosphate buffer solution (PBS, pH = 7.4, 9 mL). Chemical and radiochemical purity was determined by analytical HPLC (25 $\times$ 0.46 cm, water/acetonitrile/TFA from 8/2/0.01 v/v/v to 2/8/0.01 v/v/v in 30 min, 2 mL $\cdot$ min $^{-1}$ ). Peptide **2b** was obtained in a RCY of  $26 \pm 3$  % (decay-corrected,  $37 \pm 3$  min). Chemical and radiochemical purity exceed 95 % for > 4 hours. A specific activity of  $76 \pm 8$  GBq/ $\mu$ mol was obtained.

***Radiosynthesis of [ $^{18}$ F]Fmoc-Cys(FB)-Arg-OH (3b)***

Peptide **3** (0.75  $\mu$ mol) was solved in a 2/1 (v/v) mixture (150  $\mu$ L) of DMSO/phosphate buffer (pH 8.5, 0.2 M) and added to a solution of [ $^{18}$ F]SFB (~2 GBq) in DMSO (100  $\mu$ L). After reacting at room temperature for 10 min, the crude was diluted with aqueous TFA (0.1%, 2.6 mL) and injected into a semipreparative HPLC (25 $\times$ 1 cm, water/acetonitrile/TFA from 8/2/0.01 v/v/v to 2/8/0.01 v/v/v in 15 min, 5 mL $\cdot$ min $^{-1}$ ). The fraction with product ( $t_r$  ~ 12-14 min) was collected and passed through a Sep-Pak light C18 cartridge (Waters, Inc.) after dilution with saline (0.9 %, 20 ml). The cartridge was rinsed with water (10 mL) and compound **3b** was eluted with ethanol



(1 mL) over phosphate buffer solution (PBS, pH = 7.4, 9 mL). Chemical and radiochemical purity were determined by analytical HPLC (25×0.46 cm, water/acetonitrile/TFA from 8/2/0.01 v/v/v to 2/8/0.01 v/v/v in 30 min, 2 mL·min<sup>-1</sup>) to be > 95 % for > 4 hours with a specific activity of 79 ± 9 GBq/μmol. **3b** was obtained in a RCY of 57 ± 4 % (decay-corrected, 31 ± 3 min).

***Radiosynthesis of the [<sup>18</sup>F]peptide-FB conjugate (4b)***

[<sup>18</sup>F]SFB dry residue (~2 GBq) was dissolved in DMSO (100 μL) and added to a solution of **4** (0.75 μmol) in a 2/1 (v/v) mixture (150 μL) of DMSO/phosphate buffer (pH 8.5, 0.2 M). After reacting at room temperature for 10 min, the reaction mixture was diluted with aqueous TFA (0.1%, 2.6 mL) and purified by semipreparative HPLC (25×1 cm, water/acetonitrile/TFA from 9/1/0.01 v/v/v to 6/4/0.01 v/v/v in 30 min, 5 mL·min<sup>-1</sup>). The desired fraction (t<sub>r</sub> ~ 18-20 min) was diluted with saline solution (0.9 %, 30 ml) and passed through a Sep-Pak light C18 cartridge (Waters, Inc.). The cartridge was rinsed with water (10 mL) and **4b** was eluted with ethanol (1 mL) over PBS (pH = 7.4) solution (9 mL). Chemical and radiochemical purity was estimated by analytical HPLC (25×0.46 cm, water/acetonitrile/TFA from 8/2/0.01 v/v/v to 2/8/0.01 v/v/v in 30 min, 2 mL·min<sup>-1</sup>). **4b** was obtained in a RCY of 54 ± 4 % (decay-corrected, 38 ± 3 min), with chemical and radiochemical purity over 95 % for > 4 hours. A specific activity of 70 ± 5 GBq/μmol was estimated.

# <sup>1</sup>H and 2D TOCSY NMR spectra of **2**

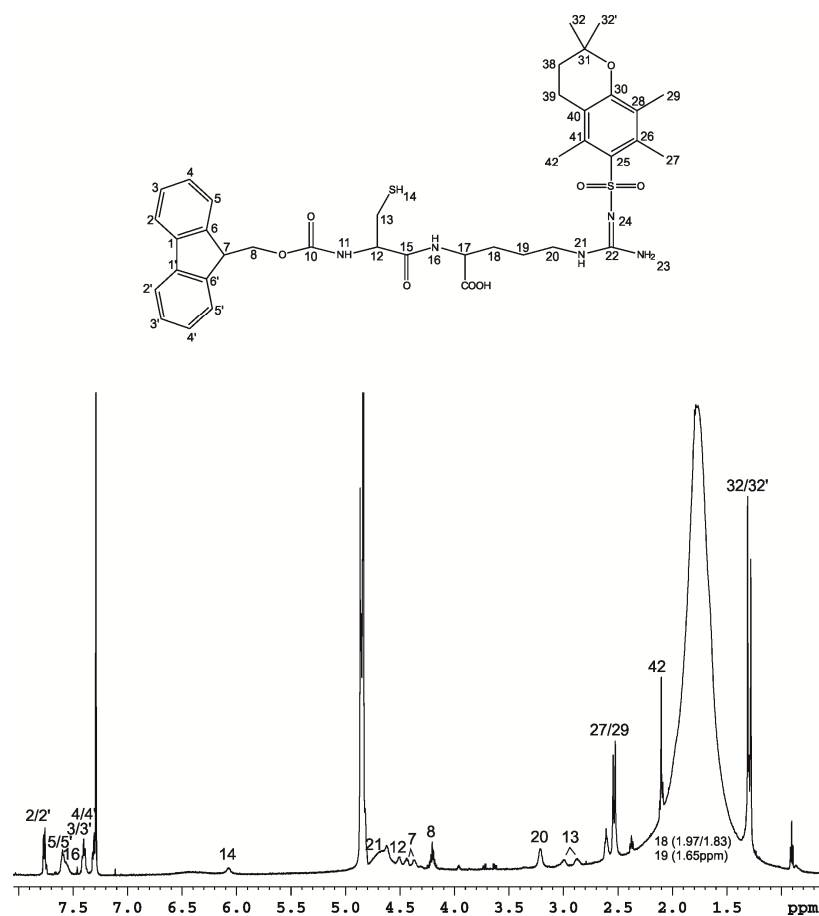

**Figure S1.** <sup>1</sup>H NMR spectrum of **2** acquired in a 600 MHz Bruker spectrometer (CDCl<sub>3</sub>).

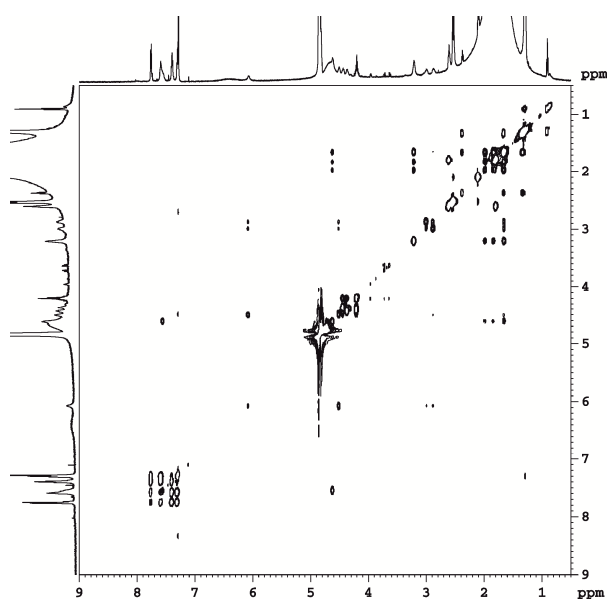

**Figure S2.** 2D TOCSY NMR spectrum of **2** acquired in a 600 MHz Bruker spectrometer (CDCl<sub>3</sub>).

# $^1\text{H}$ and $^{13}\text{C}$ NMR spectra of **3**

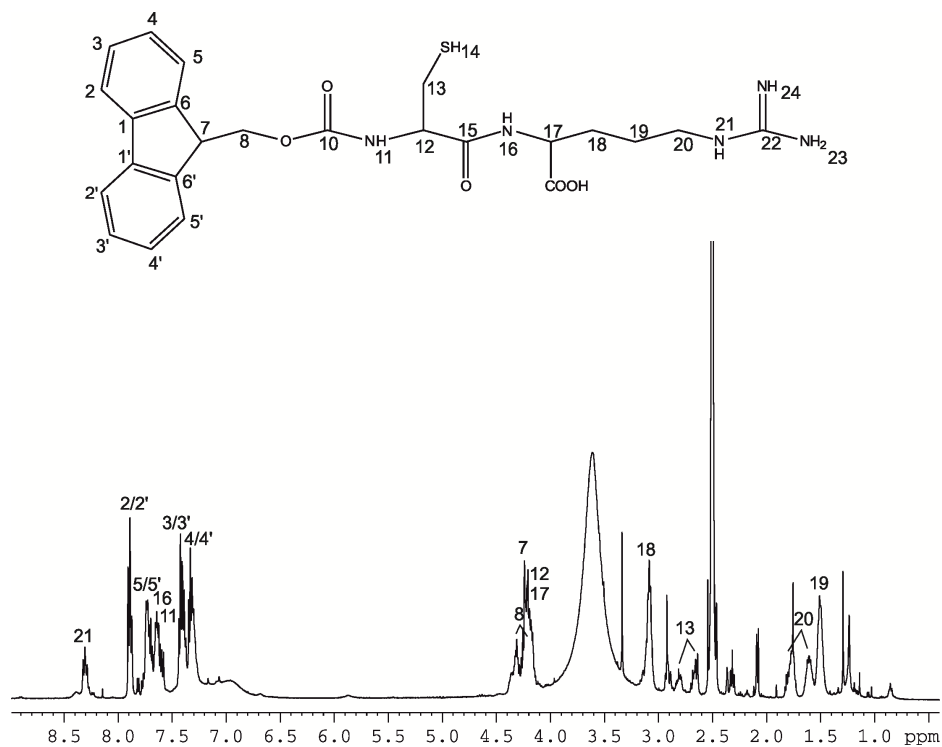

**Figure S3.**  $^1\text{H}$  NMR spectrum of **3** acquired in a 500 MHz Bruker spectrometer (DMSO).

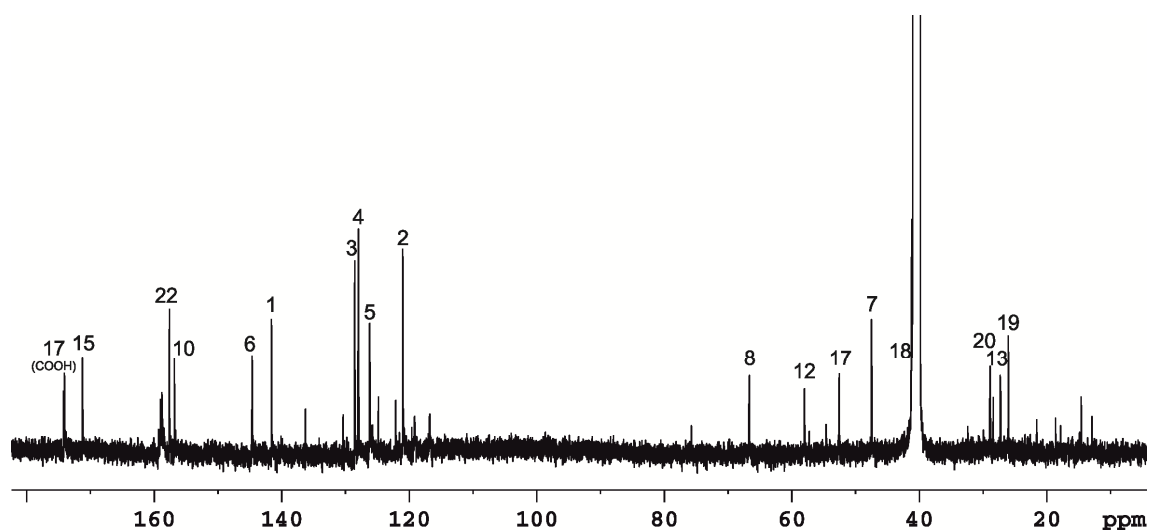

**Figure S4.**  $^{13}\text{C}$  NMR spectrum of **3** acquired in a 500 MHz Bruker spectrometer (DMSO).

$^1\text{H}$ ,  $^{13}\text{C}$ , 2D COSY, 2D HSQC, and 2D HMBC NMR spectra of **1a**

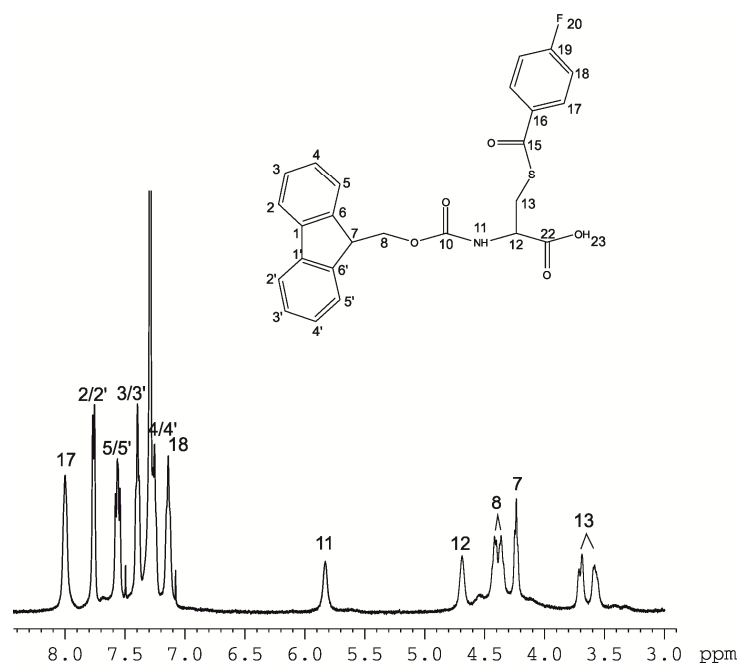

**Figure S5.**  $^1\text{H}$  NMR spectrum of **1a** acquired in a 500 MHz Bruker spectrometer ( $\text{CDCl}_3$ ).

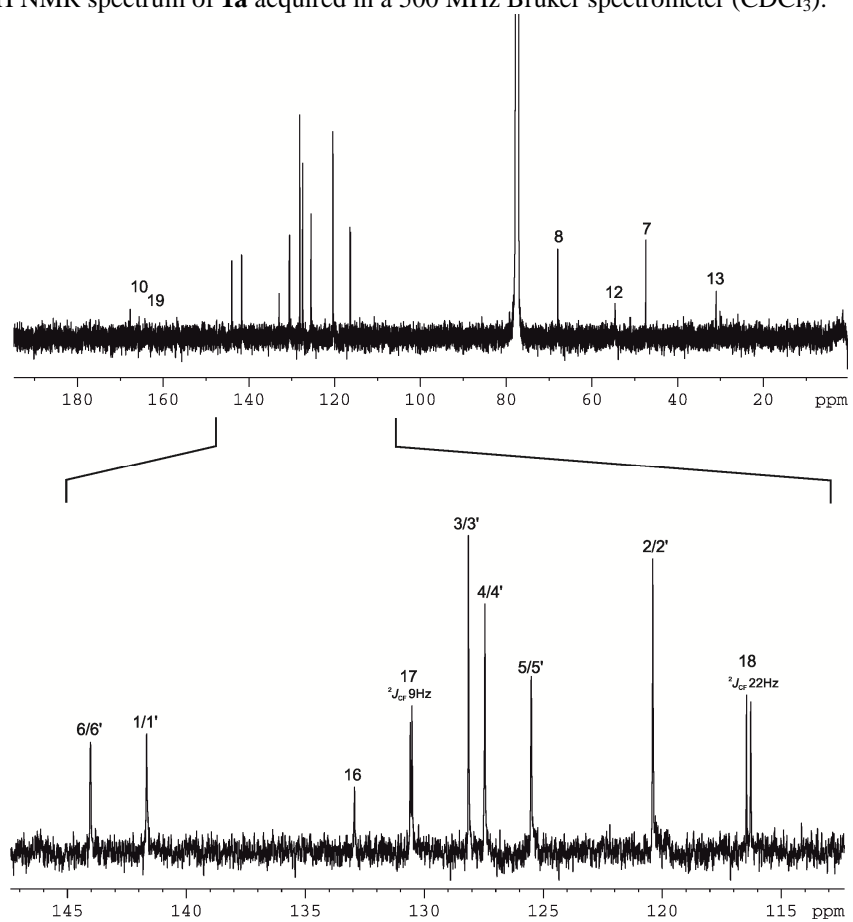

**Figure S6.**  $^{13}\text{C}$  NMR spectrum of **1a** acquired in a 500 MHz Bruker spectrometer ( $\text{CDCl}_3$ ).

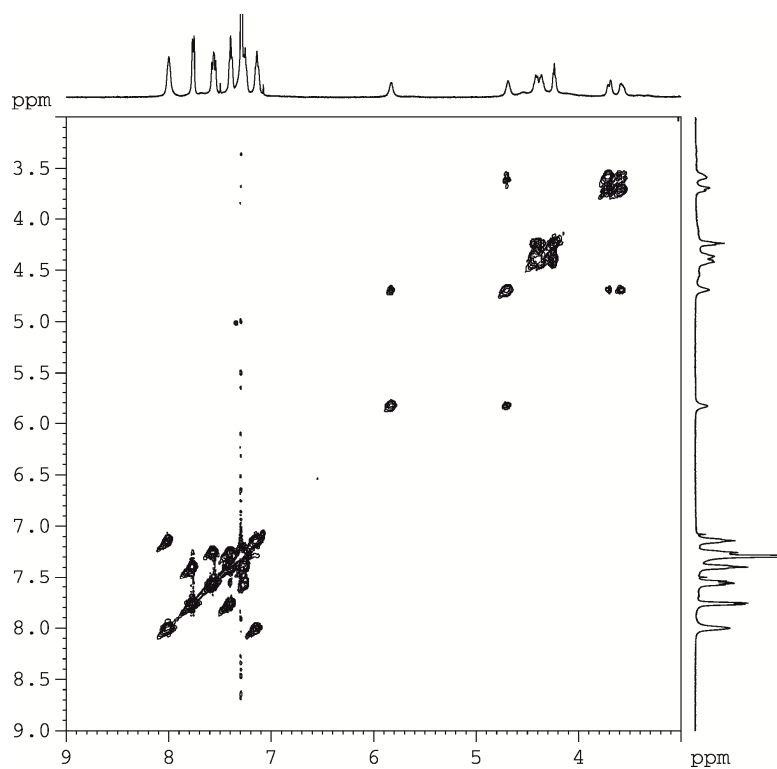

**Figure S7.** 2D COSY NMR spectrum of **1a** acquired in a 500 MHz Bruker spectrometer ( $\text{CDCl}_3$ ).

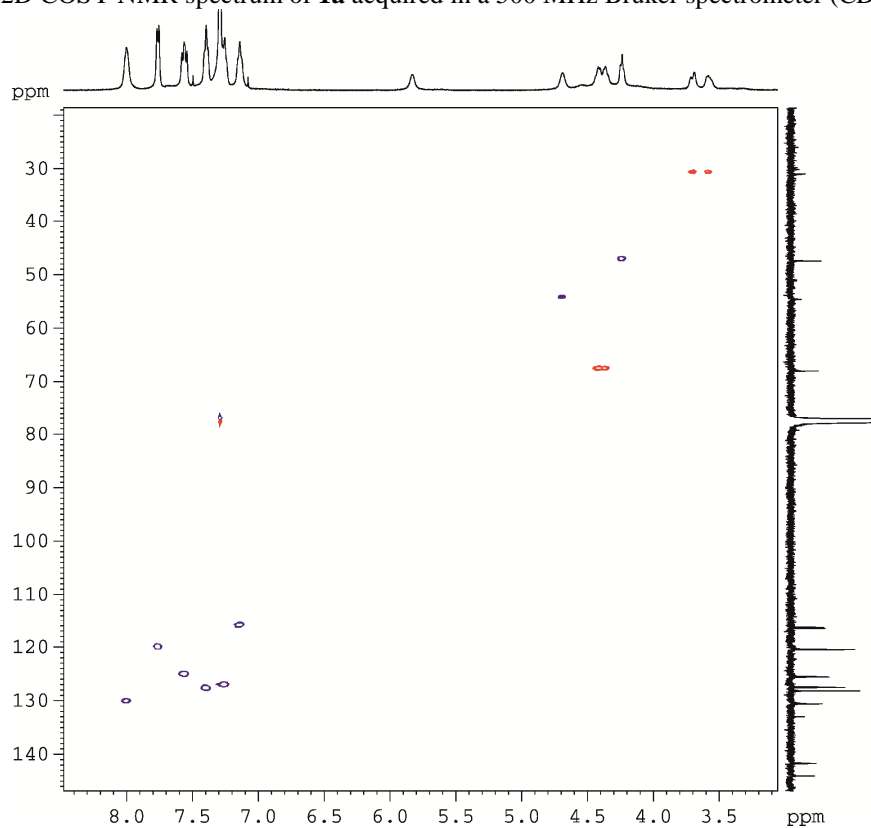

**Figure S8.** Multiplicity edited 2D HSQC NMR spectrum of **1a** acquired in a 500 MHz Bruker spectrometer ( $\text{CDCl}_3$ ). CH are marked blue and  $\text{CH}_2$  are marked red.

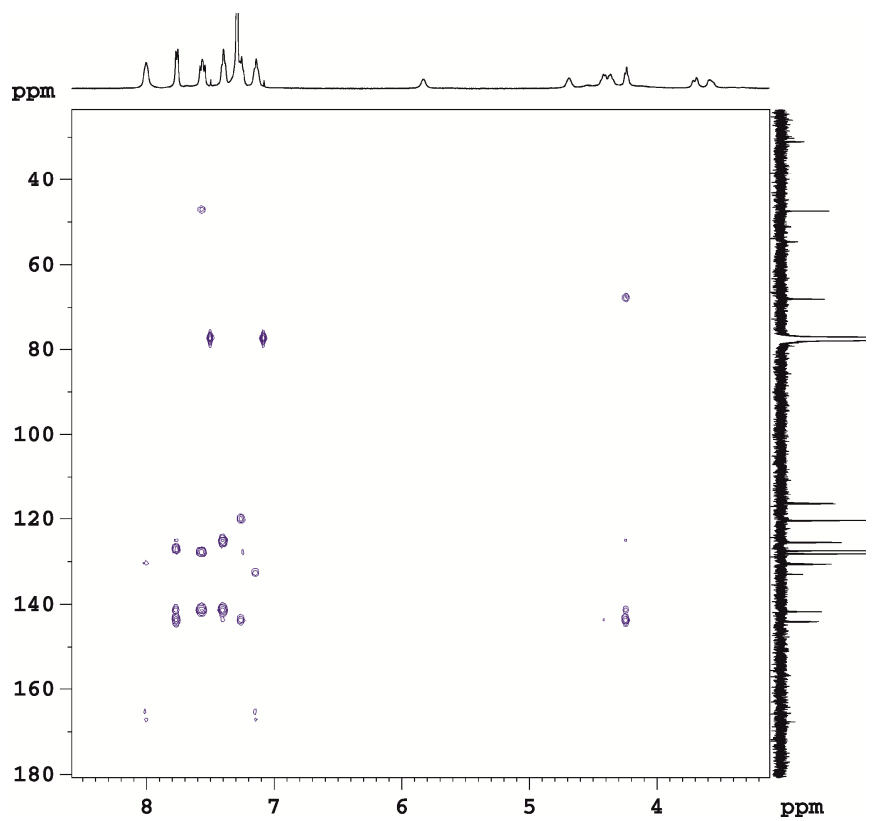

**Figure S9.** 2D HMBC NMR spectrum of **1a** acquired in a 500 MHz Bruker spectrometer (CDCl<sub>3</sub>).

$^1\text{H}$ ,  $^{13}\text{C}$ , 2D COSY, 2D HSQC, and 2D HMBC NMR spectra of **2a**

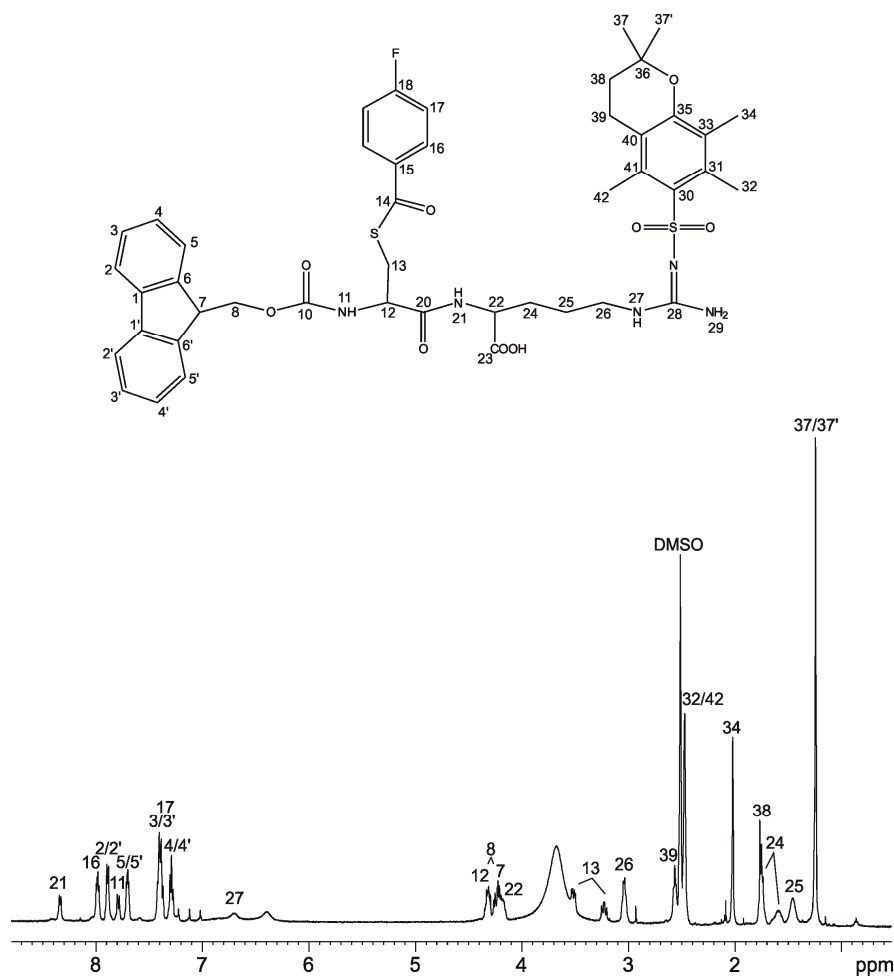

**Figure S10.**  $^1\text{H}$  NMR spectrum of **2a** acquired in a 500 MHz Bruker spectrometer (DMSO).

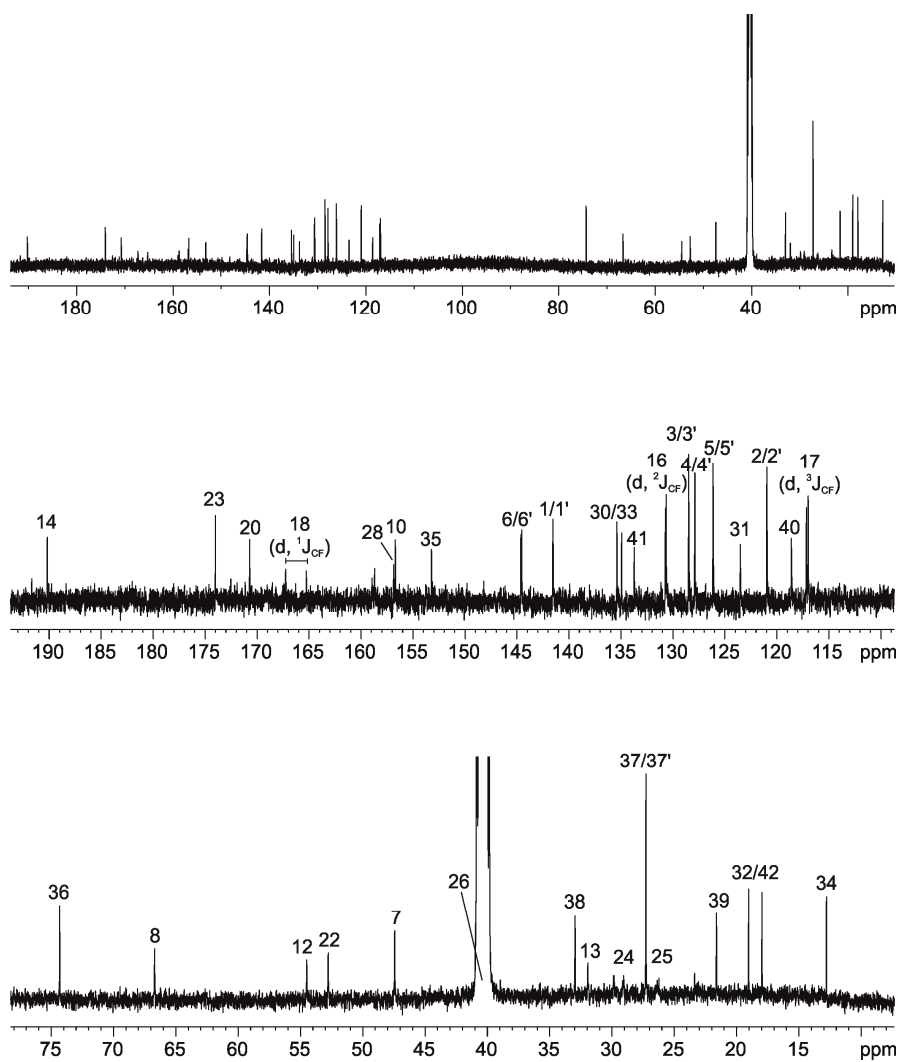

**Figure S11.**  $^{13}\text{C}$  NMR spectrum of **2a** acquired in a 500 MHz Bruker spectrometer (DMSO).

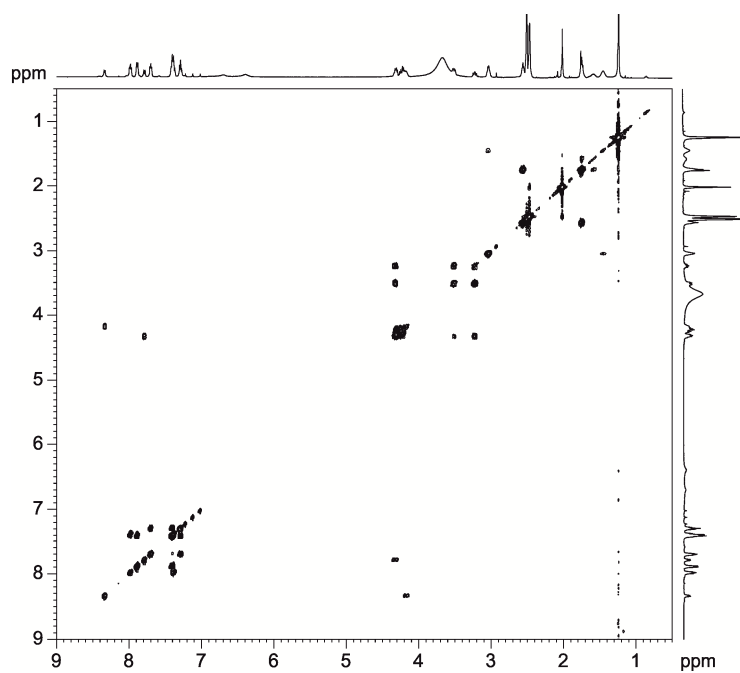

**Figure S12.** 2D COSY NMR spectrum of **2a** acquired in a 500 MHz Bruker spectrometer (DMSO).



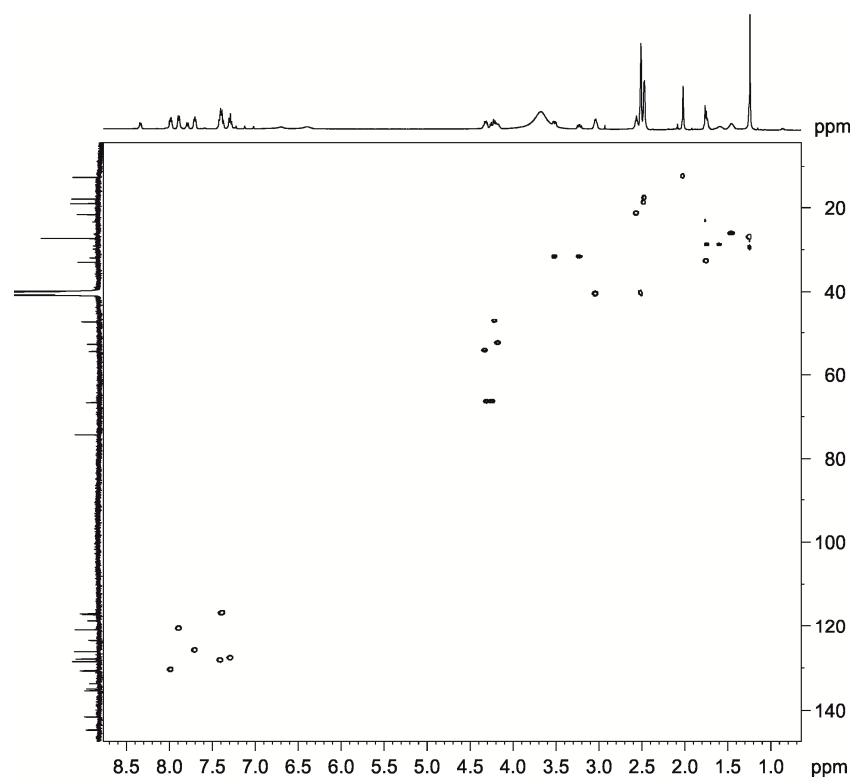

**Figure S13.** 2D HSQC NMR spectrum of **2a** acquired in a 600 MHz Bruker spectrometer (DMSO).

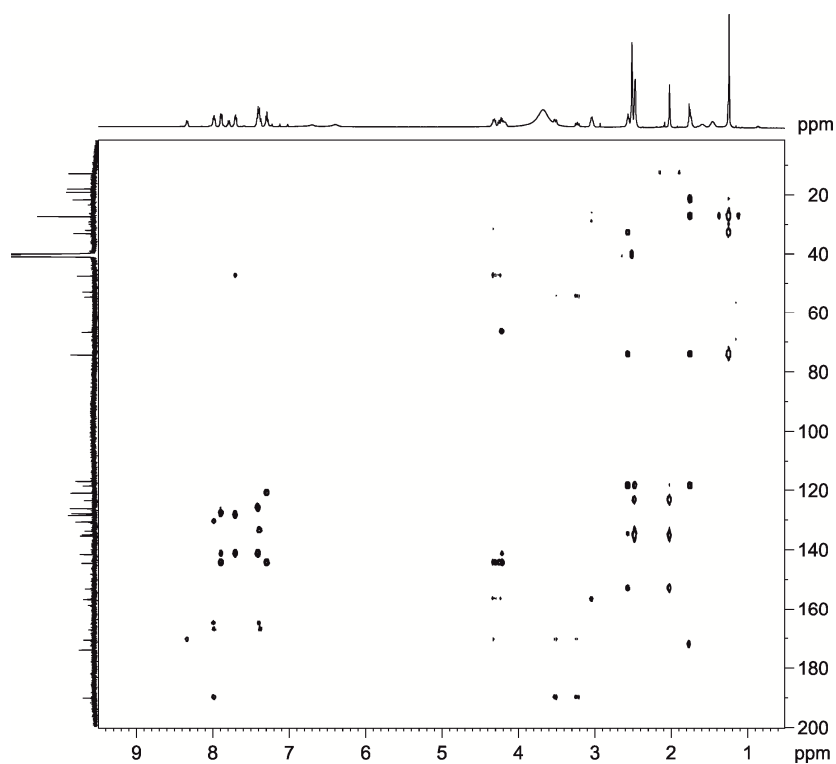

**Figure S14.** 2D HMBC NMR spectrum of **2a** acquired in a 500 MHz Bruker spectrometer (DMSO).

$^1\text{H}$ ,  $^{13}\text{C}$ , 2D TOCSY, 2D HSQC, and 2D HMBC NMR spectra of **3a**

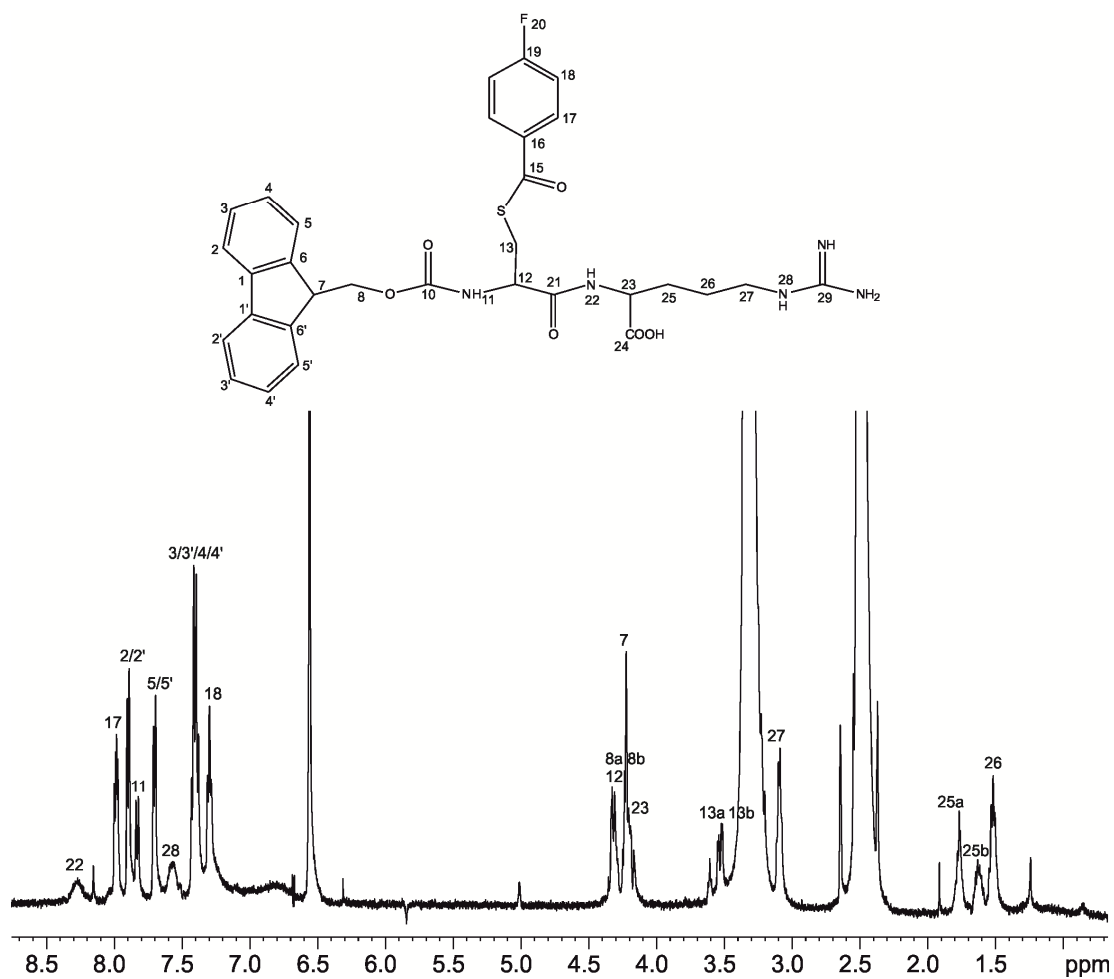

**Figure S15.**  $^1\text{H}$  NMR spectrum of **3a** acquired in a 500 MHz Bruker spectrometer (DMSO).

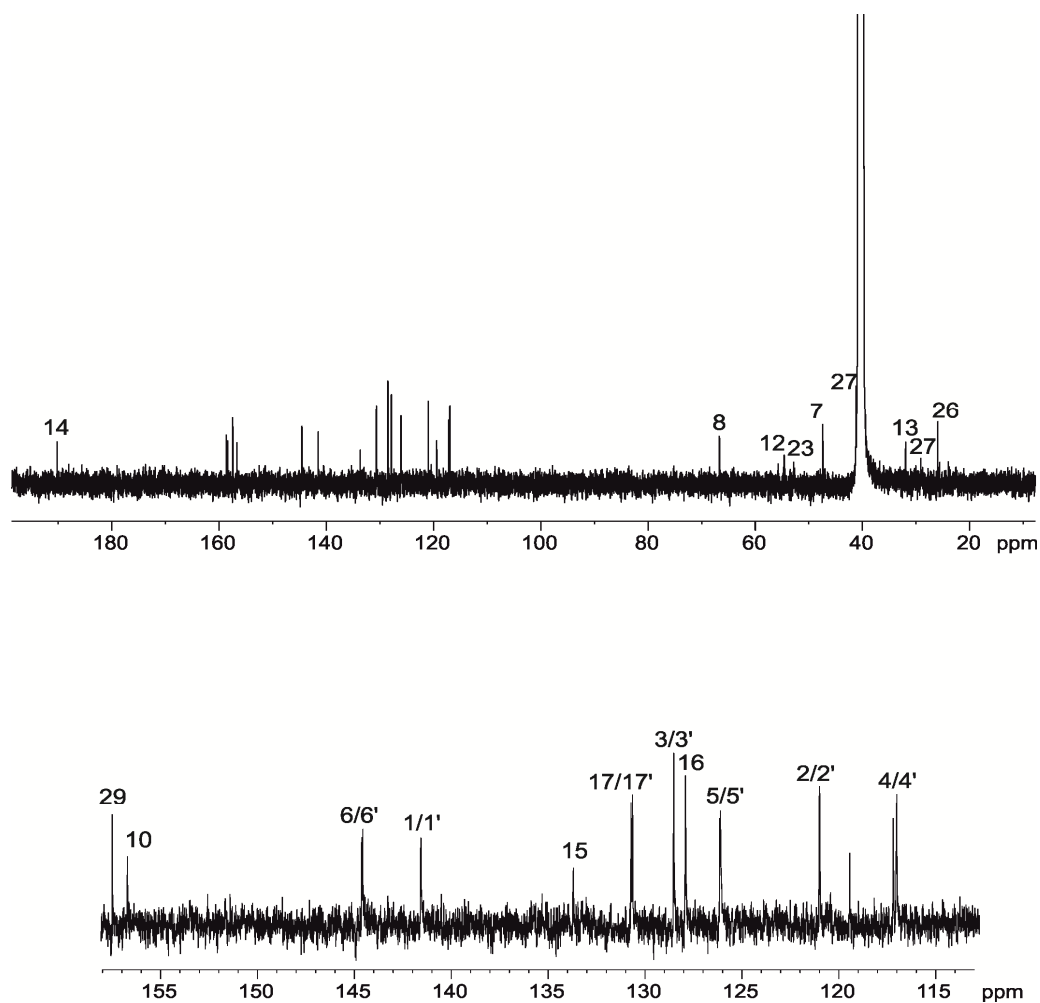

**Figure S16.**  $^{13}\text{C}$  NMR spectrum of **3a** acquired in a 500 MHz Bruker spectrometer (DMSO).

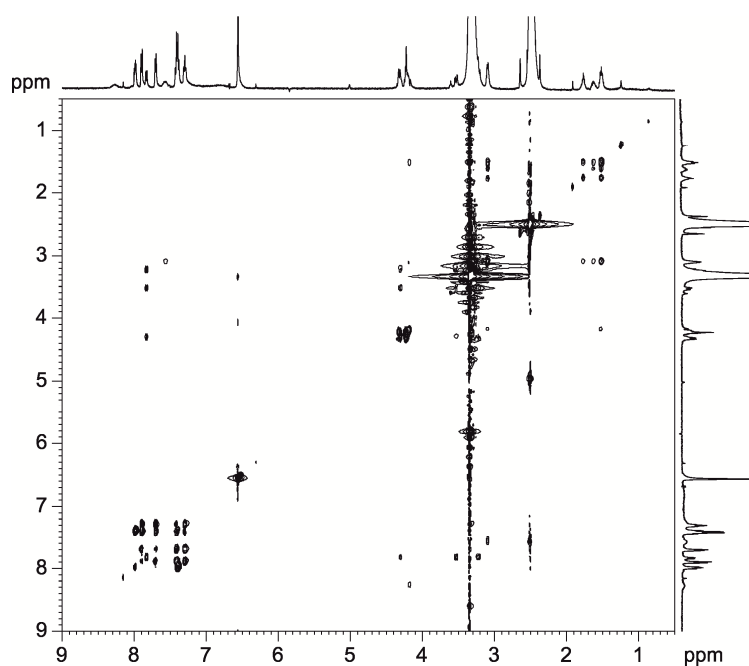

**Figure S17.** 2D TOCSY NMR spectrum of **3a** acquired in a 500 MHz Bruker spectrometer (DMSO).

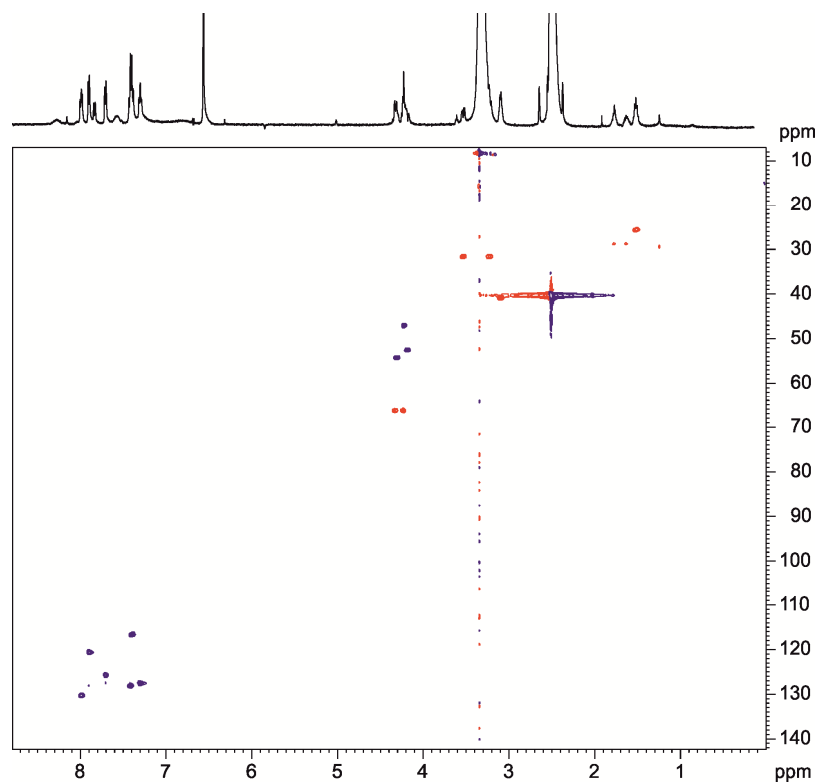

**Figure S18.** Multiplicity edited 2D HSQC NMR spectrum of **3a** acquired in a 500 MHz Bruker spectrometer (DMSO). CH are marked blue and CH<sub>2</sub> are marked red.

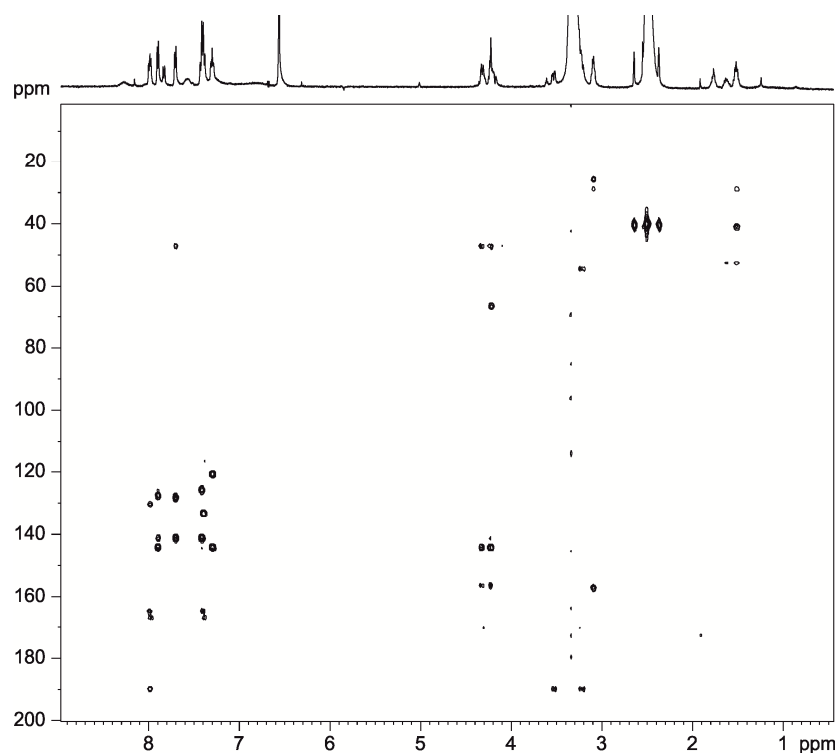

**Figure S19.** 2D HMBC NMR spectrum of **3a** acquired in a 500 MHz Bruker spectrometer (DMSO).

NMR characterisation of 4a

The complete  $^1\text{H}$ ,  $^{13}\text{C}$  and  $^{15}\text{N}$  chemical shift assignment residue by residue has been possible by standard NMR experiments. Figure S10, shows the expanded  $\text{CH}\alpha$  region of the  $^1\text{H}/^{13}\text{C}$ -HSQC experiment and Figure S11 shows an expanded region of the multiplicity edited  $^1\text{H}/^{15}\text{N}$ -HSQC. In both experiments all residues are clearly seen. A key experiment for the assignment of residue spin systems was HSQC-TOCSY (Figure S12). Scheme S1 and Table S1 summarize the  $^1\text{H}$ ,  $^{13}\text{C}$ ,  $^{15}\text{N}$  and  $^{19}\text{F}$  chemical shift assignments.

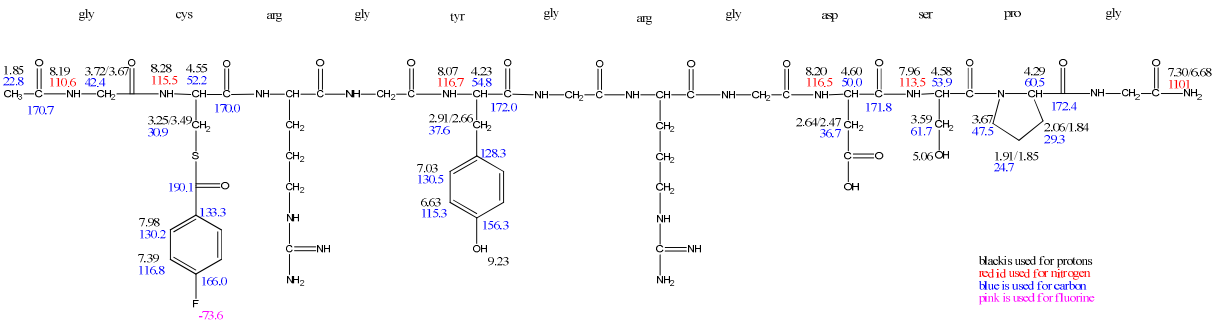

Scheme S1. Chemical shift assignment of  $^1\text{H}$ ,  $^{13}\text{C}$ ,  $^{15}\text{N}$  and  $^{19}\text{F}$  for peptide 4a

|            |                                             |                              |
|------------|---------------------------------------------|------------------------------|
| Glycine 1  | NH                                          | 106.4/8.26                   |
|            | CH <sub>2</sub>                             | 42.3/3.76                    |
| Glycine 2  | NH                                          | 106.4/8.26                   |
|            | CH <sub>2</sub>                             | 42.3/3.73                    |
| Glycine 3  | NH                                          | 105.8/8.08                   |
|            | CH <sub>2</sub>                             | 42.3/3.78                    |
| Glycine 4  | NH                                          | 105.3/8.03                   |
|            | CH <sub>2</sub>                             | 42.2/3.59                    |
| Arginine 1 | NH                                          | 118.9/8.16                   |
|            | CH                                          | 53.8/4.25                    |
|            | CH <sub>2</sub>                             | 29.4/(1.75-1.69)/(1.60-1.53) |
|            | CH <sub>2</sub>                             | 25.4/(1.54-1.43)             |
|            | CH <sub>2</sub>                             | 41.2/(3.13-3.04)             |
|            | NHCNHNH <sub>2</sub> (exchangeable protons) |                              |
| Arginine 2 | NH                                          | 117.4/8.07                   |
|            | CH                                          | 52.5/4.30                    |
|            | CH <sub>2</sub>                             | 29.4/(1.75-1.69)/(1.60-1.53) |
|            | CH <sub>2</sub>                             | 25.4/(1.54-1.43)             |
|            | CH <sub>2</sub>                             | 41.2/(3.12-3.04)             |
|            | NHCNHNH <sub>2</sub> (exchangeable protons) |                              |

Table S1: Assignment of glycine and arginine residues. Although each residue can be totally assigned independently, due to a lack of resolution in both carbonyl and alfa carbon regions we cannot accurately assign which signals belong to each glycine or arginine into the peptide chain.

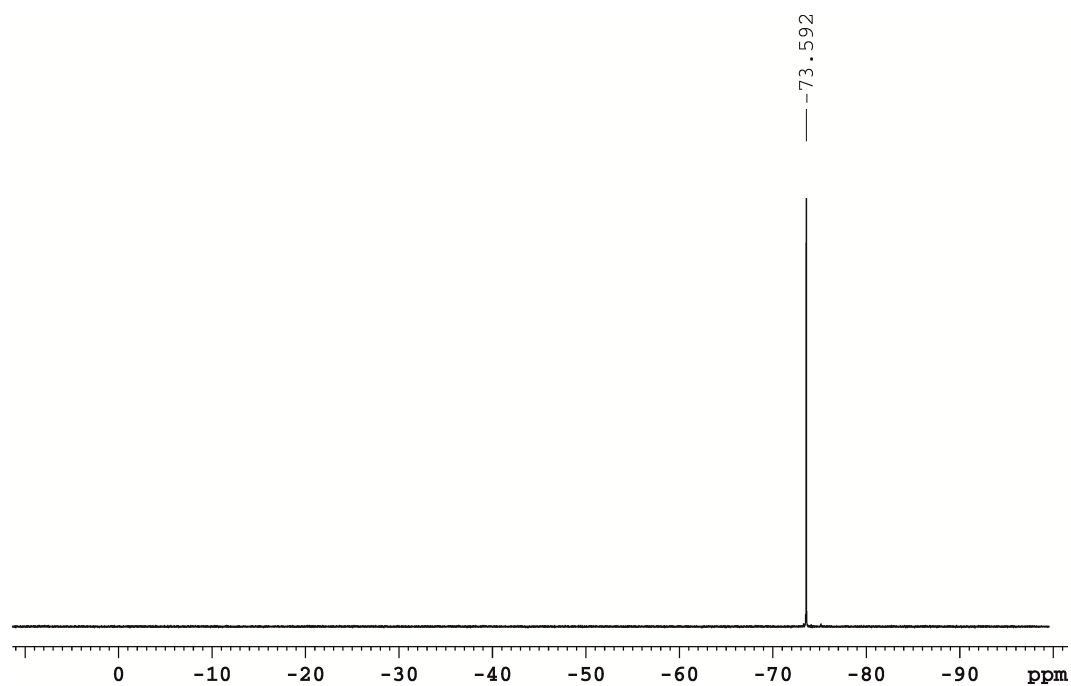

**Figure S20.**  $^{19}\text{F}\{^1\text{H}\}$ -NMR spectrum of **4a** acquired in a Bruker 400 MHz spectrometer (DMSO).

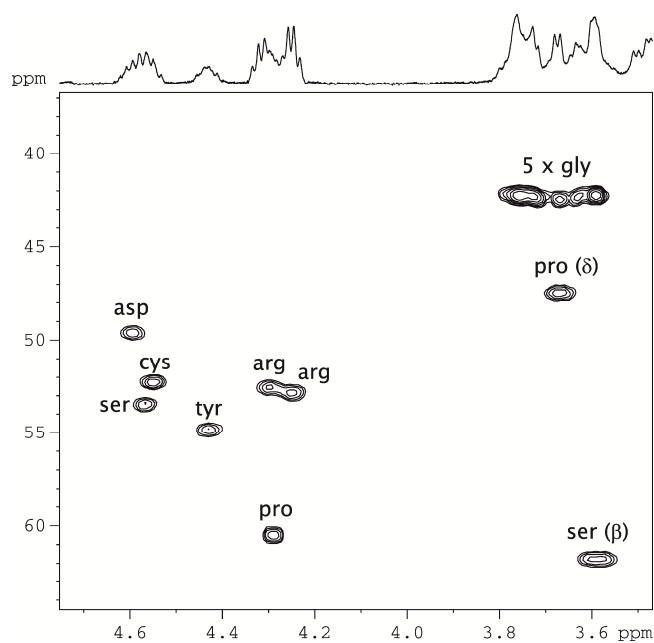

**Figure S21.**  $\text{CH}\alpha$  region of  $^1\text{H}/^{13}\text{C}$ -HSQC NMR spectrum of **4a** acquired in a Bruker 500 MHz spectrometer (DMSO).

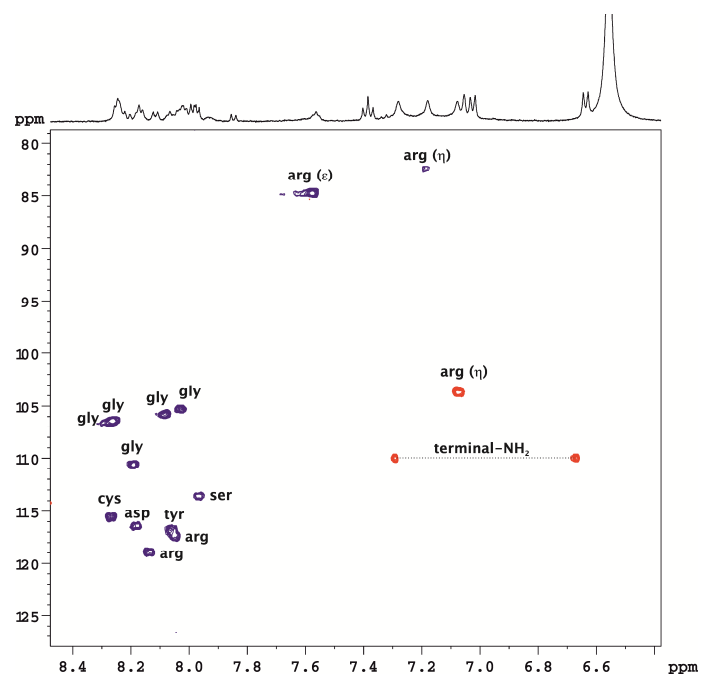

**Figure S22.**  $^1\text{H}/^{15}\text{N}$ -HSQC NMR spectrum of **4a** acquired in a Bruker 500 MHz spectrometer (DMSO).

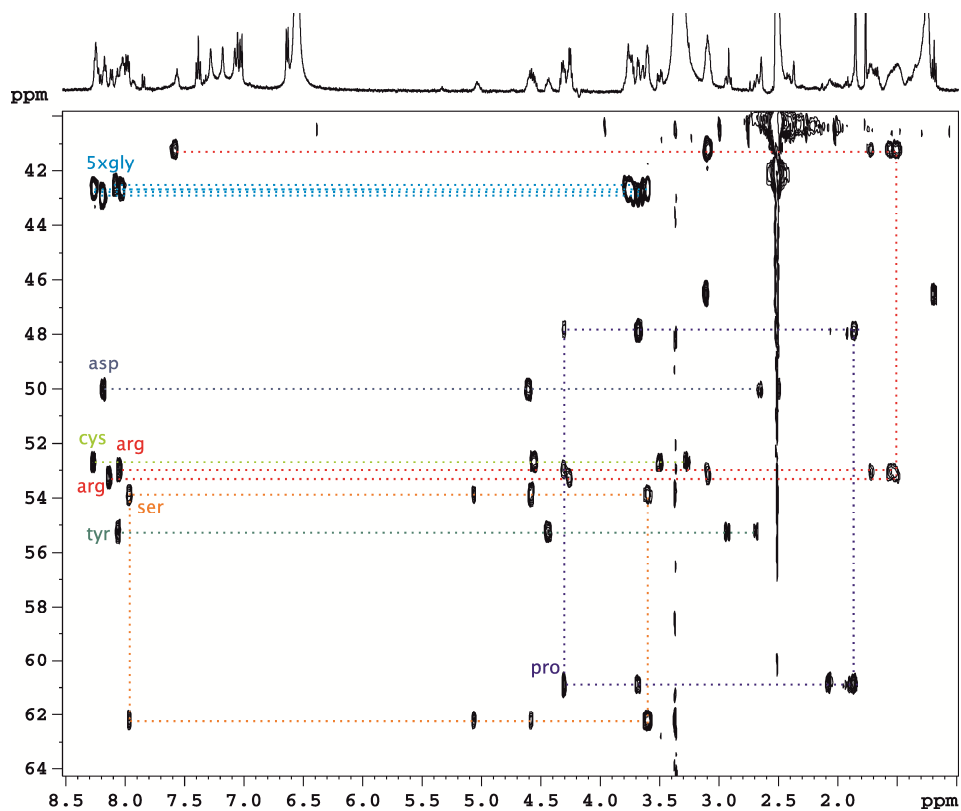

**Figure S23.** Assignment of residue spin system in  $^1\text{H}/^{13}\text{C}$ -HSQC-TOCSY NMR spectrum of **4a**. Experiment is acquired in a Bruker 500 MHz spectrometer (DMSO).

The key NMR experiment to confirm that undoubtedly 4-fluorobenzoyl was attached to the Cys residue was the  $^1\text{H}/^{13}\text{C}$ -HMBC experiment, which allowed to link  $\text{CH}_2\beta$  protons of Cys with the carbonyl of 4-fluorobenzoyl group, as schematically indicated in Figure S11.

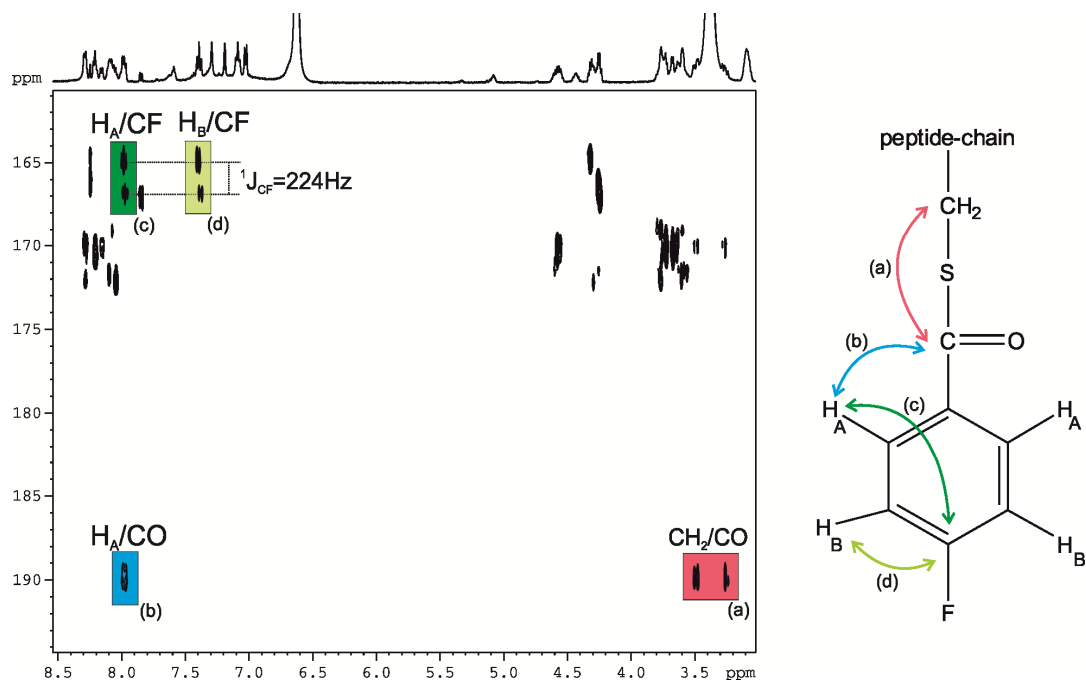

**Figure S24.**  $^1\text{H}/^{13}\text{C}$  HMBC NMR spectrum (DMSO) demonstrates that 4-fluorobenzoyl group is linked to Cys residue.
